# Supplementary material
Source: publisher figshare collection journal article supplement (https://karger.figshare.com/ndownloader/files/33079556)
Supplement: Supplementary file 1 [file 33079556]

**Supplementary Table 1:** Search strategy

| **Pubmed/Medline** | **Scopus** | **Embase** |
| --- | --- | --- |
| (“polypharmacy”[Mesh] OR polypharmacy[tw] OR polypragmas*[tw] OR hyperpharmacotherapy[tw] OR multiple drug use*[tw] OR multiple drug therap*[tw] OR multiple drug prescri* [tw] OR multiple drug regimen*[tw] OR multi-drug use*[tw] OR multi-drug therap*[tw] OR multi-drug regimen*[tw] OR multidrug use*[tw] OR multidrug therap*[tw] OR multidrug prescri* [tw] OR multidrug regimen*[tw] OR concomitant drug use*[tw] OR concomitant drug therap*[tw] OR concomitant drug regimen*[tw] OR concurrent drug use*[tw] OR concurrent drug therap*[tw] OR multiple medication use*[tw] OR multiple medication regimen*[tw] OR concomitant medication use*[tw] OR concomitant medication therap*[tw] OR concomitant medication regimen*[tw] OR concurrent medication use*[tw] OR concurrent medication therap*[tw] OR concurrent medication regimen*[tw]) AND(“parkinson”[Mesh] OR parkinson[tw] OR parkinson disease [tw] OR amnesia[tw] OR amentias[tw] OR demention[tw] OR "Parkinson disease"[Mesh] OR Parkinsons[tw] OR Parkinsonism[tw] OR Parkinson-type[tw]. | ( TITLE-ABS-KEY ( polypharmacy OR polypragmas* OR hyperpharmacotherapy OR "multiple drug use*" ) OR TITLE-ABS-KEY ( "multiple drug therap*" OR "multiple drug prescri*" OR "multiple drug regimen*" OR "multi-drug use*" ) OR TITLE-ABS-KEY ( "multi-drug therap*" OR "multi-drug regimen*" OR "multidrug use*" OR "multidrug therap*" ) OR TITLE-ABS-KEY ( "multidrug prescri*" OR "multidrug regimen*" OR "concomitant drug use*" ) OR TITLE-ABS-KEY ( "concomitant drug therap*" OR "concomitant drug regimen*" OR "concurrent drug use*" ) OR TITLE-ABS-KEY ( "concurrent drug therap*" OR "multiple medication use*" OR "multiple medication regimen*" ) OR TITLE-ABS-KEY ( "concomitant medication use*" OR "concomitant medication therap*" OR "concomitant medication regimen*" ) OR TITLE-ABS-KEY ( "concurrent medication use*" OR "concurrent medication therap*" OR "concurrent medication regimen*" ) AND TITLE-ABS-KEY ( parkinson OR Parkinsons disease OR parkinsonism OR amentias OR OR pd OR Parkinson’s OR Parkinson-type”)) | ('polypharmacy'/exp OR (polypharma* OR polypragmas* OR hyperpharmacotherap* OR multimedication OR multi-medication):ab,ti OR ((multiple OR concomitant OR concurrent) NEAR/2 (medication OR medicine OR drug) NEAR/2 (use* OR therap*)):ab,ti OR ((multi-drug OR multidrug) NEAR/2 (prescri* OR regimen* OR treat*)):ab,ti) AND ('parkinson'/exp OR ‘parkinson disease’/exp OR (parkinson OR parkinsons OR amentia OR amentias OR parkinsonsdisease OR Parkinsonism OR Parkinson-type OR ‘parkinson_disease’):ab,ti) |
